# Supplementary material for: On the importance of plant phenology in the evaporative process of a semi-arid woodland: could it be why satellite-based evaporation estimates in the miombo differ?
Source: Copernicus journal article supplement (doi:10.5194/hess-28-3633-2024), 2024-08-12
Supplement: Supplementary file 1 [file hess-28-3633-2024-supplement.pdf]

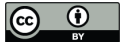

*Supplement of*

**On the importance of plant phenology in the evaporative process of a semi-arid woodland: could it be why satellite-based evaporation estimates in the miombo differ?**

**Henry M. Zimba et al.**

*Correspondence to:* Henry M. Zimba ([henryzimba@yahoo.co.uk](mailto:henryzimba@yahoo.co.uk))

The copyright of individual parts of the supplement might differ from the article licence.

## Supplement S

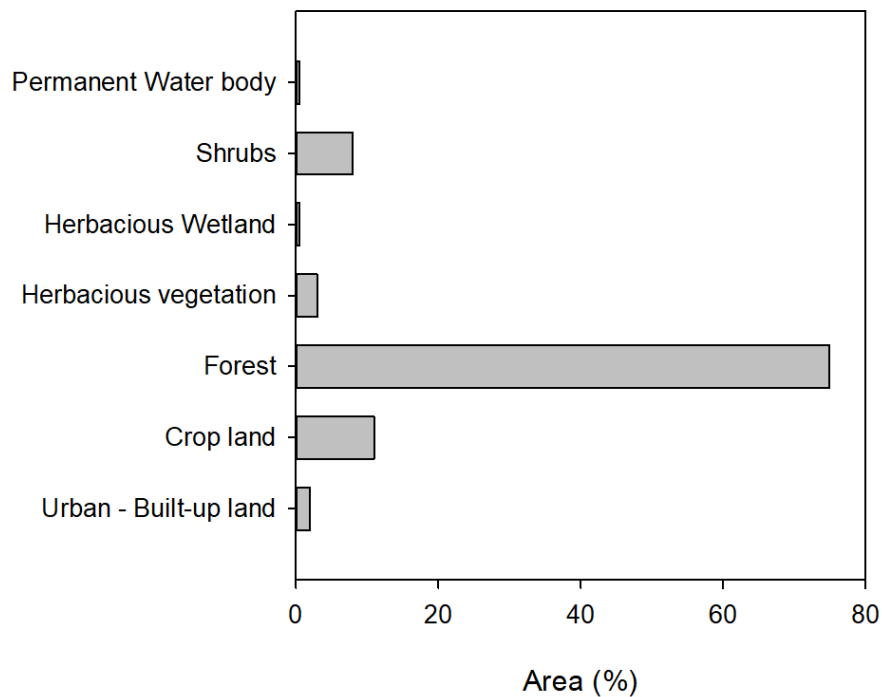

Figure S1. Landcover composition of the Luangwa Basin. About 75 % of the forest classification of the Luangwa Basin is miombo woodland.

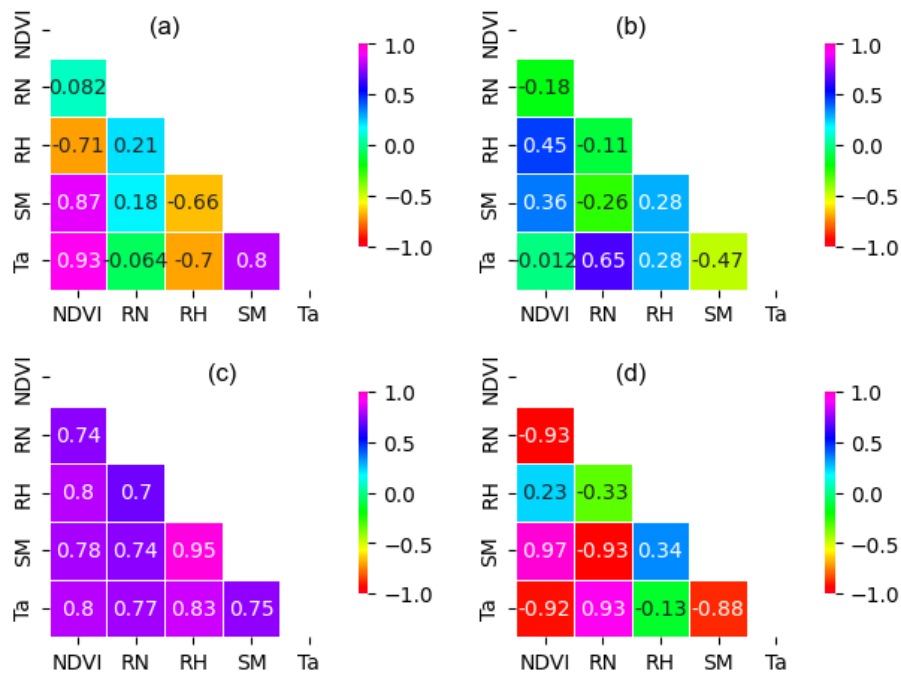

Figure S2. Phenophase-based temporal correlation of climate variables (RN, RH, SM, Ta) and phenology proxy (NDVI) of the miombo woodland in the Luangwa Basin. Phenophases for the period 2009 to 2020: (a) green-up/mid-green-up, (b) maturity/peak, (c) senescence/mid-green-down and (d) dormant RN = net radiation, SM = soil moisture, RH = relative humidity.

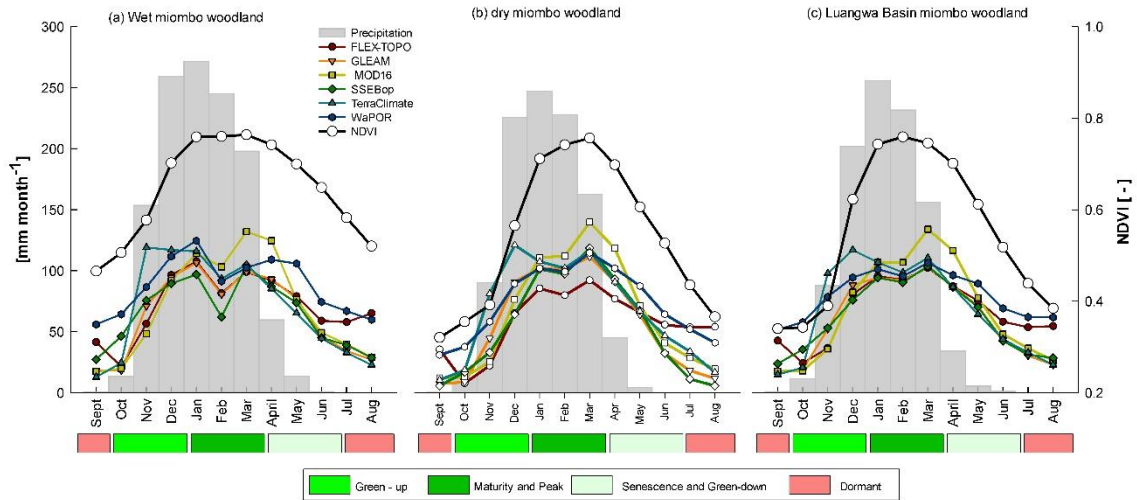

Figure S3: Comparison of aggregated 2009-2020 satellite-based evaporation estimates in relation to the NDVI (a) at wet miombo woodland, (b) dry miombo woodland, (c) delineated Luangwa Basin miombo woodland across hydrological year (September – August) in the Luangwa Basin and (d) Correlation of aggregated monthly satellite-based evaporation estimates and NDVI at pixel level (D = dry miombo woodland pixel, W = wet miombo woodland pixel) and Luangwa Basin scale (L = Luangwa Basin miombo woodland).

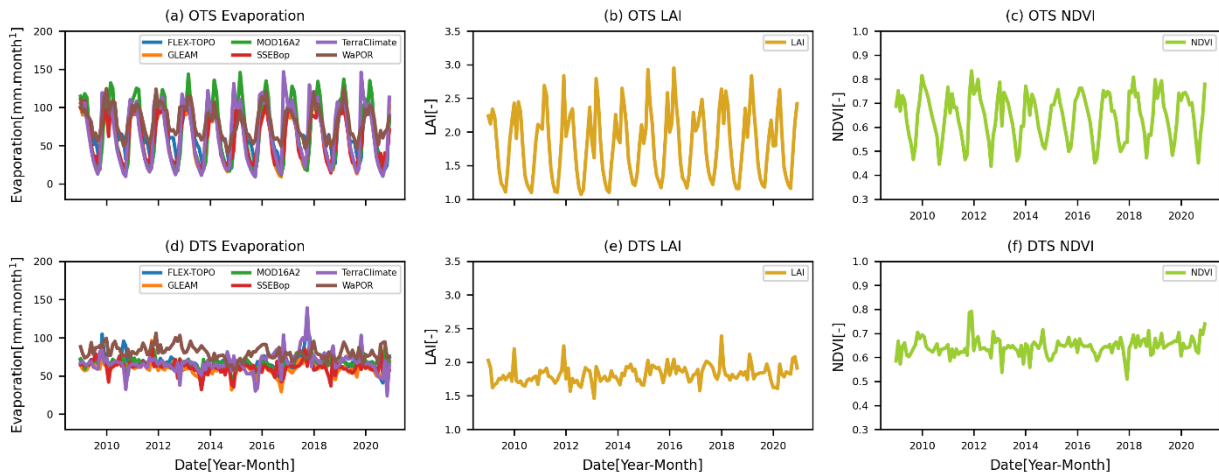

Figure S4: Evaporation, NDVI and LAI original time series (OTS) (a, b, c) and deseasonalised time series (DTS) (d, e, f) of evaporation, NDVI and LAI respectively, for the period 2009 to 2020.

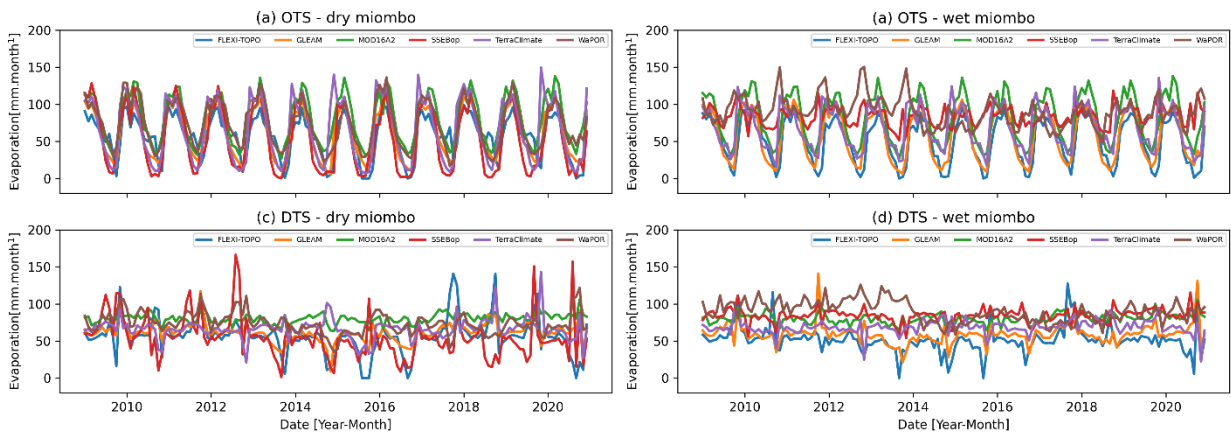

Fig. S5. Original time series (OTS) and deseasonalised time series (DTS) of satellite-based evaporation estimates for the dry miombo woodland (a, c) and the wet miombo woodland (b, d) for the period 2009 to 2020. There are visible differences in the mean estimates of evaporation in the deseasonalised time series indicative of the differences in the capacity of each satellite-based evaporation estimate.

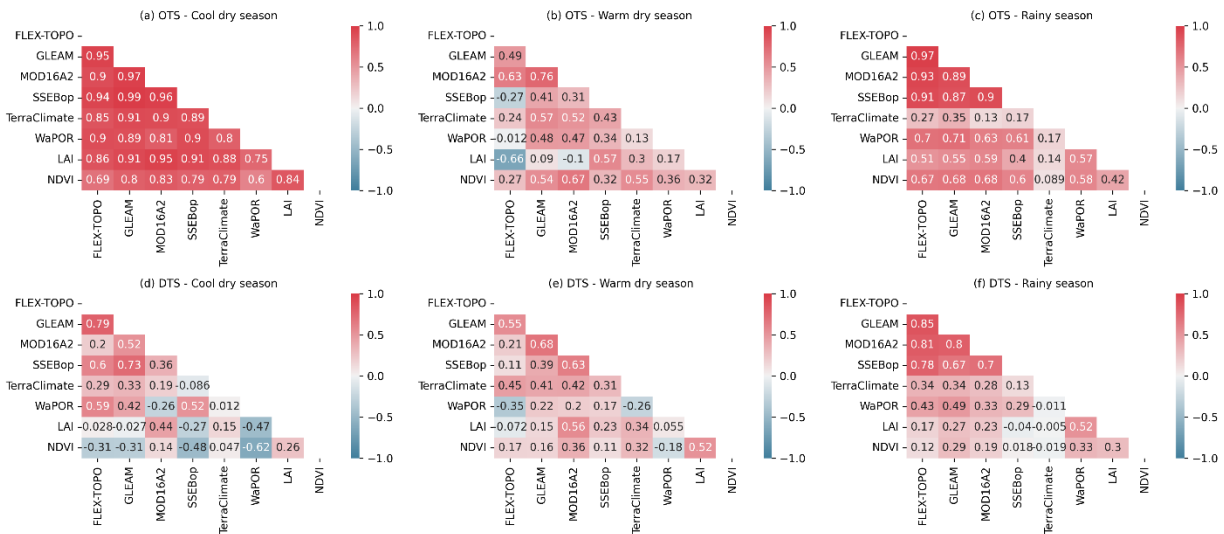

Figure S6. Climate-based phenophases correlation of satellite-based evaporation estimates for the dry miombo woodland for the period 2009 to 2020; (a-c) original time series (OTS) and (d-f) deseasonalised time series (DTS).

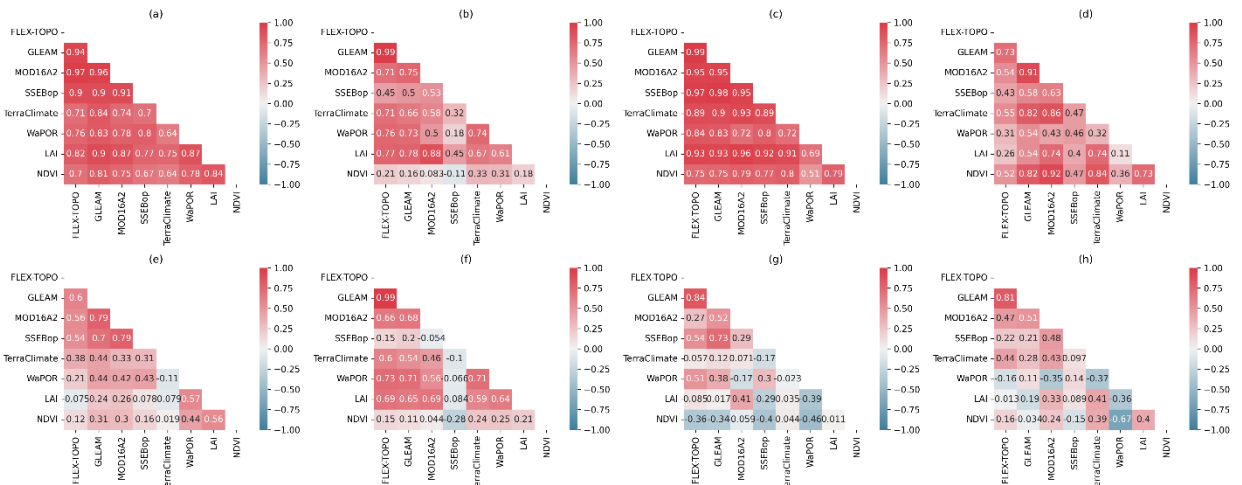

Figure S7. Satellite-based phenophases temporal correlation of satellite-based evaporation estimates for the dry miombo woodland; (a-d) original time series (OTS) and (e-h) deseasonalised time series (DTS) for the period 2009 to 2020.

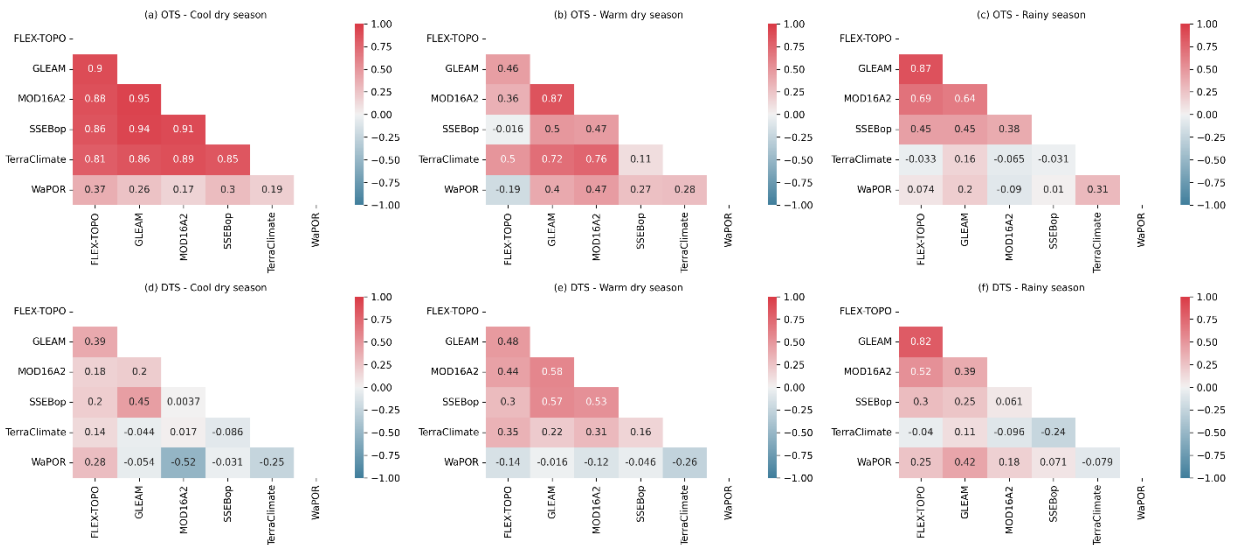

Figure S8. Climate phenophase-based correlation of satellite-based evaporation estimates for the wet miombo woodland for the period 2009 to 2020; (a-c) original time series (OTS) and (d-f) deseasonalised time series (DTS).

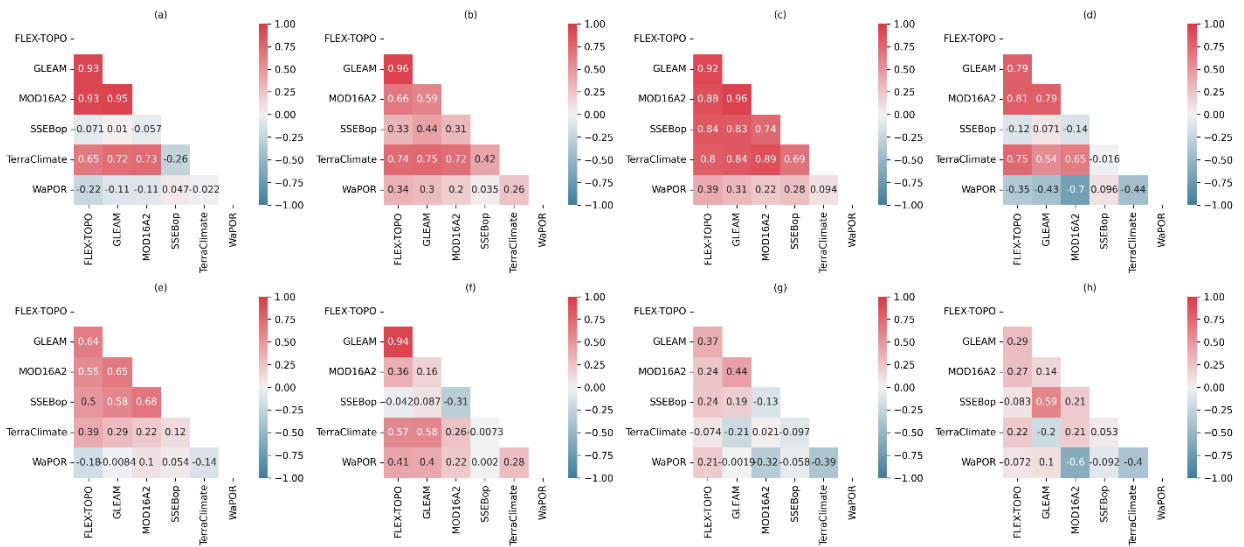

Figure S9. Satellite-based phenophase-based correlation of satellite-based evaporation estimates for the wet miombo woodland; (a-d) original time series (OTS) and (e-h) deseasonalised time series (DTS).

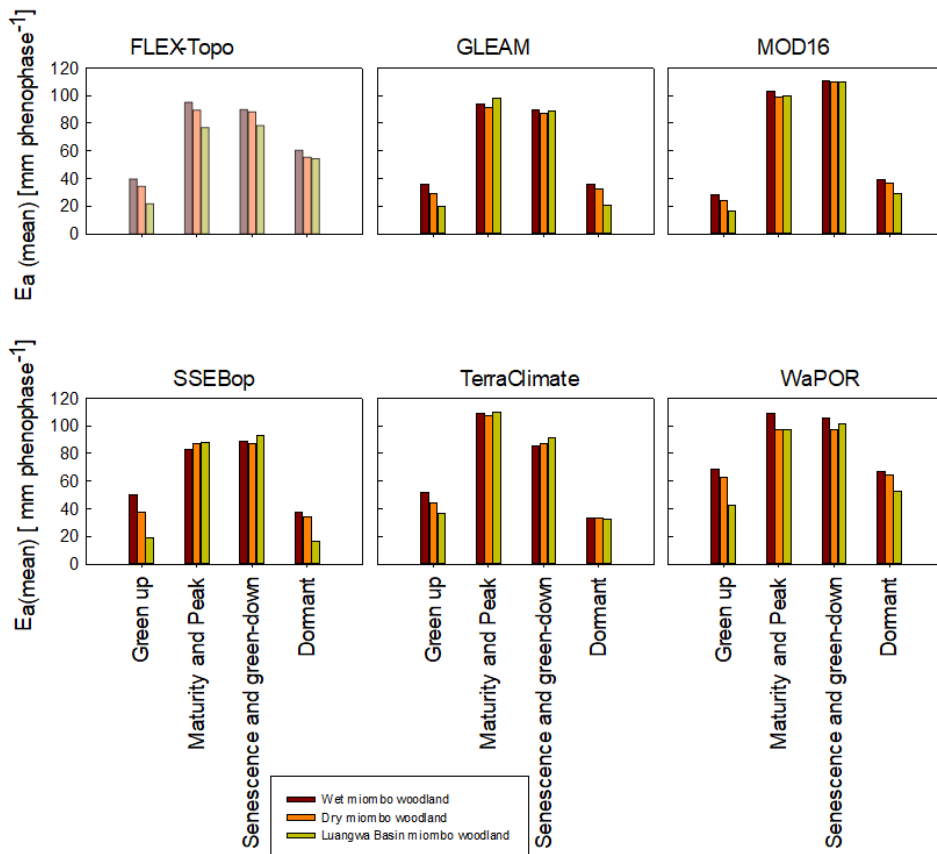

Figure S10. Temporal comparison of original time series of aggregated averages of satellite-based evaporation estimates for the wet miombo woodland, dry miombo woodland and Luangwa Basin miombo woodland for the period 2009 to 2020.

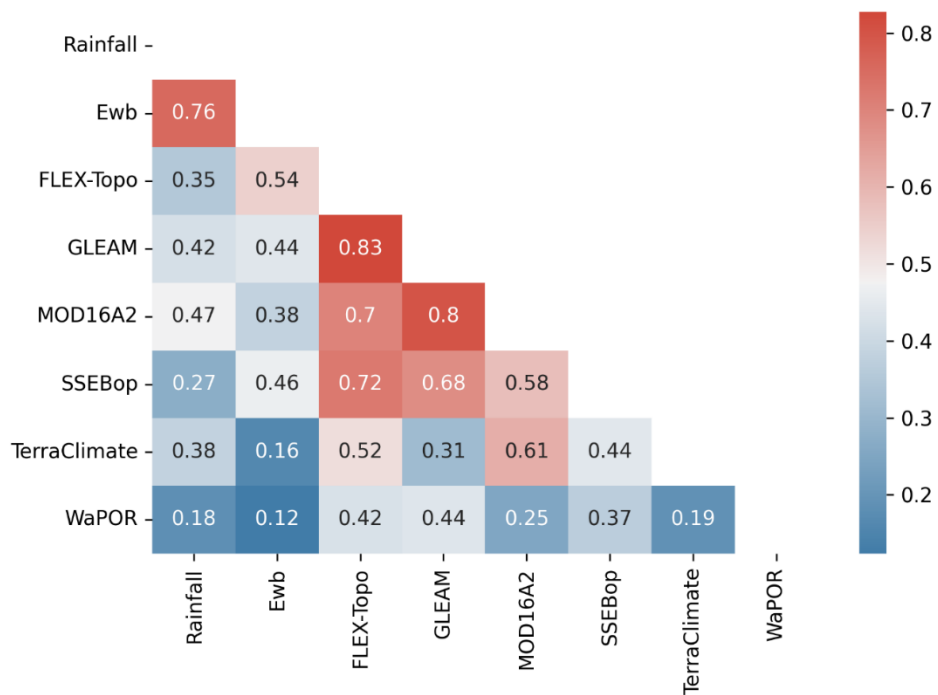

Figure S11. Pearson correlation coefficients of temporal average annual values of rainfall and evaporation time series for the period 2009 to 2020 in the Luangwa Basin, Zambia, southern Africa.

**Table S1.** Comparison of satellite precipitation products to field observations for selected weather stations in Zambia. Satellite precipitation average (mm year<sup>-1</sup>) for the years 2014, 2015 and 2016 at each station except for Mpika whose data is for the year 2021 only and GART Chisamba for 2020 - 2022. Performance of satellite precipitation differed geographically and annually.

|                                     | YEAR AND NAME OF WEATHER STATION |              |               |               |               |                |
|-------------------------------------|----------------------------------|--------------|---------------|---------------|---------------|----------------|
|                                     | 2020                             | 2014         | 2014          | 2014          | 2014          | 2021           |
|                                     | GART-Chisamba                    | Kabwe        | KKIA          | Mwinilunga    | Serenje       | Mpika          |
| Precipitation product               |                                  |              |               |               |               |                |
| TerraClimate                        | 798.00                           | 924.00       | 661.00        | 1697.00       | 1416.00       | 1081.00        |
| CHIRPS                              | 918.47                           | 819.11       | 892.75        | 1683.62       | 812.32        | 1225.91        |
| ERA5                                | 791.50                           | 901.58       | 801.69        | 1690.80       | 1006.03       | 992.89         |
| CFSR                                | 984.01                           | 1660.00      | 1510.40       | 1665.10       | 1911.51       | 1109.98        |
| Average of satellite-products (ASP) | 873.00                           | 1076.17      | 966.46        | 1684.13       | 1286.47       | 1102.45        |
| Field observations (FO)             | 906.20                           | 1076.90      | 931.10        | 1721.30       | 1283.40       | 1305.63        |
| <b>Difference (ASP -FO)</b>         | <b>-33.20</b>                    | <b>-0.73</b> | <b>35.36</b>  | <b>-37.17</b> | <b>3.07</b>   | <b>-203.18</b> |
|                                     | 2021                             | 2015         | 2015          | 2015          | 2015          |                |
| Precipitation product               | GART-Chisamba                    | Kabwe        | KKIA          | Mwinilunga    | Serenje       |                |
| TerraClimate                        | 813.00                           | 698.00       | 292.00        | 1633.00       | 1361.00       |                |
| CHIRPS                              | 772.54                           | 892.18       | 754.11        | 1229.23       | 949.14        |                |
| ERA5                                | 828.34                           | 929.34       | 794.56        | 1713.43       | 1028.21       |                |
| CFSR                                | 996.30                           | 1459.14      | 1423.96       | 1691.93       | 1466.68       |                |
| Average of satellite-products (ASP) | 852.54                           | 994.66       | 816.16        | 1566.90       | 1201.26       |                |
| Field observations (FO)             | 818.20                           | 933.40       | 875.20        | 1309.20       | 1223.20       |                |
| Difference (ASP -FO)                | <b>34.34</b>                     | <b>61.26</b> | <b>-59.04</b> | <b>257.70</b> | <b>-21.94</b> |                |
|                                     | 2022                             | 2016         | 2016          | 2016          | 2016          |                |
| Precipitation product               | GART-Chisamba                    | Kabwe        | KKIA          | Mwinilunga    | Serenje       |                |
| TerraClimate                        | 1062.00                          | 1593.00      | 1454.00       | 1640.00       | 1641.00       |                |
| CHIRPS                              | 916.46                           | 1053.56      | 911.35        | 1133.92       | 928.65        |                |
| ERA5                                | 1038.22                          | 948.21       | 803.85        | 1364.78       | 1119.54       |                |
| CFSR                                | 1106.78                          | 1994.70      | 1212.78       | 1805.85       | 1730.83       |                |
| Average of satellite-products (ASP) | 1030.86                          | 1397.37      | 1095.49       | 1486.14       | 1355.00       |                |
| Field observations (FO)             | 950.20                           | 1343.60      | 743.00        | 1177.20       | 798.60        |                |
| <b>Difference (ASP - FO)</b>        | <b>80.66</b>                     | <b>53.77</b> | <b>352.49</b> | <b>308.94</b> | <b>556.40</b> |                |

| Weather station              | LOCATION    |             |
|------------------------------|-------------|-------------|
|                              | Latitude    | Longitude   |
| Serenje                      | 13.2267° S  | 30.21508° E |
| Kabwe                        | 14.29257° S | 28.56632° E |
| Lusaka International Airport | 15.31929° S | 28.4405° E  |
| Mwinilunga                   | 11.73998° S | 24.431° E   |
| Gart Chisamba                | 14.94656° S | 28.08952° E |
| Mpika                        | 12.3869° S  | 31.172° E   |

**Note:** Negative (-) value shows underestimation while positive value indicates overestimation by satellite precipitation products



**Table S2.** Summary of the results of the ANOVA of the satellite-based evaporation estimates for the dry miombo woodland and wet miombo woodland in the Luangwa Basin

| Estimate     | Normality test<br>(Kolmogorov-Smirnov) |                                    |
|--------------|----------------------------------------|------------------------------------|
|              | (p-value)                              | Differences in the means (P-value) |
| FLEX-Topo    | 0.44                                   | 0.674                              |
| GLEAM        | 0.059                                  | 0.772                              |
| MOD16        | 0.56                                   | 0.851                              |
| SSEBop       | 0.108                                  | 0.774                              |
| TerraClimate | 0.178                                  | 0.912                              |
| WaPOR        | 0.099                                  | 0.401                              |

**Note:** For normality test, P-value > 0.05 indicates data is normally distributed. For ascertaining differences in means, P-value > 0.05 indicates no statistically significant differences in the means.

**Table S3.** Mann-Kendall trends analysis results for satellite-based evaporation estimates of the miombo woodland in the Luangwa Basin, Zambia, southern Africa.

|              | Kendall's tau | S     | Var(S)     | p-value (Two-tailed) | alpha | Trend |
|--------------|---------------|-------|------------|----------------------|-------|-------|
| FLEX-Topo    | -0.130        | -1336 | 335192.000 | <b>0.021</b>         | 0.05  | Yes   |
| GLEAM        | -0.133        | -1374 | 335192.000 | <b>0.018</b>         | 0.05  | Yes   |
| MOD16A2      | 0.010         | 108   | 335192.000 | 0.853                | 0.05  | No    |
| SSEBop       | -0.219        | -2250 | 335192.000 | <b>0.000</b>         | 0.05  | Yes   |
| TerraClimate | 0.108         | 1108  | 335192.000 | 0.056                | 0.05  | No    |
| WaPOR        | -0.208        | -2144 | 335192.000 | <b>0.000</b>         | 0.05  | Yes   |

**Table S4.** Statistics of satellite-based evaporation estimates in the miombo woodland of the Luangwa Basin across different phenophases

| Product      | Green up  |           |       | Maturity and Peak |           |       | Senescence and green-down |           |       | Dormant   |           |       |
|--------------|-----------|-----------|-------|-------------------|-----------|-------|---------------------------|-----------|-------|-----------|-----------|-------|
|              | $\bar{S}$ | $\bar{x}$ | $C_v$ | $\bar{S}$         | $\bar{x}$ | $C_v$ | $\bar{S}$                 | $\bar{x}$ | $C_v$ | $\bar{S}$ | $\bar{x}$ | $C_v$ |
| FLEX-TOPO    | 47.18     | 26.52     | 55.36 | 96.76             | 7.61      | 7.75  | 73.65                     | 12.59     | 16.84 | 50.34     | 10.04     | 19.64 |
| GLEAM        | 53.18     | 30.34     | 56.19 | 96.39             | 7.74      | 7.91  | 67.33                     | 18.99     | 27.78 | 23.12     | 6.72      | 28.64 |
| MOD16        | 45.37     | 28.97     | 62.87 | 115.93            | 14.55     | 12.36 | 80.84                     | 29.00     | 35.32 | 26.81     | 8.24      | 30.28 |
| SSEBop       | 54.89     | 20.61     | 36.97 | 96.14             | 8.50      | 8.70  | 66.40                     | 18.72     | 27.77 | 27.92     | 5.72      | 20.18 |
| TerraClimate | 78.57     | 46.81     | 58.67 | 105.36            | 7.86      | 7.34  | 64.91                     | 18.74     | 28.43 | 23.53     | 8.99      | 37.62 |
| WaPOR        | 77.02     | 19.12     | 24.45 | 101.10            | 11.91     | 11.60 | 85.00                     | 14.34     | 16.61 | 58.49     | 7.58      | 12.77 |

$\bar{x}$  = standard deviation (mm/phenophase),  $C_v$  = coefficient of variation (%),  $\bar{S}$  = mean of observations

**Table S5.** Results of the ANOVA and pairwise comparison with the Tukey Test of satellite-based evaporation estimates (original time series)

**(a) Note:** Normality test (Kolmogorov-Smirnov) failed ( $P$ -value  $< 0.05$ ). The ANOVA is run on ranks. The differences in the median values among the satellite-based evaporation estimates are greater than would be expected by chance; there is a statistically significant difference ( $P = <0.001$ ).

| Green-up                  |               |        |        |
|---------------------------|---------------|--------|--------|
| Comparison                | Diff of Ranks | q      | P<0.05 |
| WaPOR vs FLEX-Topo        | 2192          | 5.846  | Yes    |
| WaPOR vs SSEBop           | 1646          | 4.389  | Yes    |
| WaPOR vs MOD16            | 1615          | 4.307  | Yes    |
| WaPOR vs GLEAM            | 1188          | 3.168  | No     |
| WaPOR vs TerraClimate     | 7             | 0.0187 | No     |
| TerraClimate vs FLEX-Topo | 2185          | 5.827  | Yes    |
| TerraClimate vs SSEBop    | 1639          | 4.371  | Yes    |
| TerraClimate vs MOD16     | 1608          | 4.288  | Yes    |
| TerraClimate vs GLEAM     | 1181          | 3.149  | Yes    |
| GLEAM vs FLEX-Topo        | 1004          | 2.677  | Yes    |
| GLEAM vs SSEBop           | 458           | 1.221  | No     |
| GLEAM vs MOD16            | 427           | 1.139  | No     |
| MOD16 vs FLEX-Topo        | 577           | 1.539  | No     |
| MOD16 vs SSEBop           | 31            | 0.0827 | Yes    |
| SSEBop vs FLEX-Topo       | 546           | 1.456  | Yes    |

**(b) Note:** Normality Test (Kolmogorov-Smirnov) passed ( $p$ -value  $> 0.098$ ). ANOVA run on means. The differences in the mean values among the satellite-based evaporation estimates are greater than would be expected by chance; there is a statistically significant difference ( $P$ -value =  $<0.001$ ).

| Maturity and Peak          |               |   |        |        |         |
|----------------------------|---------------|---|--------|--------|---------|
| Comparison                 | Diff of Means | p | q      | P      | P<0.050 |
| MOD16 vs. FLEX-Topo        | 35.075        | 6 | 16.183 | <0.001 | Yes     |
| MOD16 vs. GLEAM            | 15.934        | 6 | 7.351  | <0.001 | Yes     |
| MOD16 vs. WaPOR            | 15.631        | 6 | 7.211  | <0.001 | Yes     |
| MOD16 vs. SSEBop           | 15.111        | 6 | 6.972  | <0.001 | Yes     |
| MOD16 vs. TerraClimate     | 12.478        | 6 | 5.757  | <0.001 | Yes     |
| TerraClimate vs. FLEX-Topo | 22.598        | 6 | 10.426 | <0.001 | Yes     |
| TerraClimate vs. GLEAM     | 3.456         | 6 | 1.595  | 0.87   | No      |
| TerraClimate vs. WaPOR     | 3.153         | 6 | 1.455  | 0.908  | No      |
| TerraClimate vs. SSEBop    | 2.633         | 6 | 1.215  | 0.956  | No      |
| SSEBop vs. FLEX-Topo       | 19.964        | 6 | 9.211  | <0.001 | Yes     |
| SSEBop vs. GLEAM           | 0.823         | 6 | 0.38   | 1      | No      |
| SSEBop vs. WaPOR           | 0.52          | 6 | 0.24   | 1      | No      |
| WaPOR vs. FLEX-Topo        | 19.445        | 6 | 8.971  | <0.001 | Yes     |
| WaPOR vs. GLEAM            | 0.303         | 6 | 0.14   | 1      | No      |
| GLEAM vs. FLEX-Topo        | 19.141        | 6 | 8.831  | <0.001 | Yes     |

**(c) Note:** Normality Test (Kolmogorov-Smirnov) passed (p-value = 0.0514). ANOVA run on means. The differences in the mean values among the satellite-based evaporation estimates are greater than would be expected by chance; there is a statistically significant difference (P-value = <0.001).

| Senescence and green-down  |               |   |       |        |         |  |
|----------------------------|---------------|---|-------|--------|---------|--|
| Comparison                 | Diff of Means | p | q     | P      | P<0.050 |  |
| WaPOR vs. GLEAM            | 22.387        | 6 | 5.705 | <0.001 | Yes     |  |
| WaPOR vs. SSEBop           | 20.286        | 6 | 5.17  | 0.004  | Yes     |  |
| WaPOR vs. FLEX-Topo        | 18.447        | 6 | 4.701 | 0.011  | Yes     |  |
| WaPOR vs. TerraClimate     | 16.612        | 6 | 4.234 | 0.033  | Yes     |  |
| WaPOR vs. MOD16            | 7.892         | 6 | 2.011 | 0.714  | No      |  |
| MOD16 vs. GLEAM            | 14.496        | 6 | 3.694 | 0.094  | No      |  |
| MOD16 vs. SSEBop           | 12.394        | 6 | 3.159 | 0.222  | No      |  |
| MOD16 vs. FLEX-Topo        | 10.555        | 6 | 2.69  | 0.401  | No      |  |
| MOD16 vs. TerraClimate     | 8.72          | 6 | 2.222 | 0.618  | No      |  |
| TerraClimate vs. GLEAM     | 5.775         | 6 | 1.472 | 0.904  | No      |  |
| TerraClimate vs. SSEBop    | 3.674         | 6 | 0.936 | 0.986  | No      |  |
| TerraClimate vs. FLEX-Topo | 1.835         | 6 | 0.468 | 0.999  | No      |  |
| FLEX-Topo vs. GLEAM        | 3.941         | 6 | 1.004 | 0.981  | No      |  |
| FLEX-Topo vs. SSEBop       | 1.839         | 6 | 0.469 | 0.999  | No      |  |
| SSEBop vs. GLEAM           | 2.101         | 6 | 0.536 | 0.999  | No      |  |

**(d) Note:** Normality test (Kolmogorov-Smirnov) failed (P-value < 0.05). The ANOVA run on ranks. The differences in the median values among the satellite-based evaporation estimates are greater than would be expected by chance; there is a statistically significant difference (P = <0.001).

| Dormant                   |               |        |        |
|---------------------------|---------------|--------|--------|
| Comparison                | Diff of Ranks | q      | P<0.05 |
| FLEX-Topo vs SSEBop       | 5214          | 13.904 | Yes    |
| FLEX-Topo vs GLEAM        | 4214          | 11.238 | Yes    |
| FLEX-Topo vs TerraClimate | 3005          | 8.014  | Yes    |
| FLEX-Topo vs MOD16        | 2808          | 7.488  | Yes    |
| FLEX-Topo vs WaPOR        | 479           | 1.277  | No     |
| WaPOR vs SSEBop           | 4735          | 12.627 | Yes    |
| WaPOR vs GLEAM            | 3735          | 9.96   | Yes    |
| WaPOR vs TerraClimate     | 2526          | 6.736  | Yes    |
| WaPOR vs MOD16            | 2329          | 6.211  | Yes    |
| MOD16 vs SSEBop           | 2406          | 6.416  | Yes    |
| MOD16 vs GLEAM            | 1406          | 3.749  | No     |
| MOD16 vs TerraClimate     | 197           | 0.525  | No     |
| TerraClimate vs SSEBop    | 2209          | 5.891  | Yes    |
| TerraClimate vs GLEAM     | 1209          | 3.224  | No     |
| GLEAM vs SSEBop           | 1000          | 2.667  | No     |

**Table S6.** Results of the ANOVA and pairwise comparison with the Tukey Test of satellite-based evaporation estimates (time series adjusted for seasonality)

**(a) Green-up/Mid green-up Deseasonalised time series Kruskal-Wallis One Way Analysis of Variance on Ranks**

| <b>Group</b> | <b>N</b> | <b>Missing</b> | <b>Median</b> | <b>25%</b> | <b>75%</b> |
|--------------|----------|----------------|---------------|------------|------------|
| FLEX-Topo    | 36       | 0              | 65.300        | 59.087     | 74.775     |
| GLEAM        | 36       | 0              | 62.265        | 54.292     | 68.846     |
| MOD16A2      | 36       | 0              | 67.522        | 55.198     | 79.387     |
| SSEBop       | 36       | 0              | 61.129        | 50.721     | 69.937     |
| TerraClimate | 36       | 0              | 67.701        | 59.323     | 72.489     |
| WaPOR        | 36       | 0              | 81.189        | 73.079     | 88.760     |

H = 42.505 with 5 degrees of freedom. (P = <0.001)

The differences in the median values among the treatment groups are greater than would be expected by chance; there is a statistically significant difference (P = <0.001)

To isolate the group or groups that differ from the others use a multiple comparison procedure.

All Pairwise Multiple Comparison Procedures (Tukey Test):

| <b>Comparison</b>         | <b>Diff of Ranks</b> | <b>q</b> | <b>P&lt;0.05</b> |
|---------------------------|----------------------|----------|------------------|
| WaPOR vs GLEAM            | 3013.000             | 8.035    | Yes              |
| WaPOR vs SSEBop           | 2953.000             | 7.875    | Yes              |
| WaPOR vs FLEX-Topo        | 2214.000             | 5.904    | Yes              |
| WaPOR vs TerraClimate     | 2033.000             | 5.422    | Yes              |
| WaPOR vs MOD16A2          | 1967.000             | 5.246    | Yes              |
| MOD16A2 vs GLEAM          | 1046.000             | 2.789    | No               |
| MOD16A2 vs SSEBop         | 986.000              | 2.629    | Do Not Test      |
| MOD16A2 vs FLEX-Topo      | 247.000              | 0.659    | Do Not Test      |
| MOD16A2 vs TerraClimate   | 66.000               | 0.176    | Do Not Test      |
| TerraClimate vs GLEAM     | 980.000              | 2.613    | Do Not Test      |
| TerraClimate vs SSEBop    | 920.000              | 2.453    | Do Not Test      |
| TerraClimate vs FLEX-Topo | 181.000              | 0.483    | Do Not Test      |
| FLEX-Topo vs GLEAM        | 799.000              | 2.131    | Do Not Test      |
| FLEX-Topo vs SSEBop       | 739.000              | 1.971    | Do Not Test      |
| SSEBop vs GLEAM           | 60.000               | 0.160    | Do Not Test      |

**(b) Maturity/peak Deseasonalised time series: Kruskal-Wallis One Way Analysis of Variance on Ranks**

| <b>Group</b> | <b>N</b> | <b>Missing</b> | <b>Median</b> | <b>25%</b> | <b>75%</b> |
|--------------|----------|----------------|---------------|------------|------------|
| FLEX-Topo    | 36       | 0              | 66.138        | 64.848     | 69.393     |
| GLEAM        | 36       | 0              | 59.421        | 57.828     | 61.999     |
| MOD16A2      | 36       | 0              | 67.549        | 64.025     | 69.318     |
| SSEBop       | 36       | 0              | 62.577        | 60.981     | 63.466     |
| TerraClimate | 36       | 0              | 67.183        | 64.811     | 70.329     |
| WaPOR        | 36       | 0              | 79.526        | 76.178     | 86.103     |

H = 132.934 with 5 degrees of freedom. (P = <0.001)

The differences in the median values among the treatment groups are greater than would be expected by chance; there is a statistically significant difference (P = <0.001)

To isolate the group or groups that differ from the others use a multiple comparison procedure.

All Pairwise Multiple Comparison Procedures (Tukey Test):

| <b>Comparison</b>         | <b>Diff of Ranks</b> | <b>q</b> | <b>P&lt;0.05</b> |
|---------------------------|----------------------|----------|------------------|
| WaPOR vs GLEAM            | 5357.000             | 14.286   | Yes              |
| WaPOR vs SSEBop           | 4802.000             | 12.806   | Yes              |
| WaPOR vs FLEX-Topo        | 2638.000             | 7.035    | Yes              |
| WaPOR vs MOD16A2          | 2546.000             | 6.790    | Yes              |
| WaPOR vs TerraClimate     | 2237.000             | 5.966    | Yes              |
| TerraClimate vs GLEAM     | 3120.000             | 8.320    | Yes              |
| TerraClimate vs SSEBop    | 2565.000             | 6.840    | Yes              |
| TerraClimate vs FLEX-Topo | 401.000              | 1.069    | No               |
| TerraClimate vs MOD16A2   | 309.000              | 0.824    | Do Not Test      |
| MOD16A2 vs GLEAM          | 2811.000             | 7.496    | Yes              |
| MOD16A2 vs SSEBop         | 2256.000             | 6.016    | Yes              |
| MOD16A2 vs FLEX-Topo      | 92.000               | 0.245    | Do Not Test      |
| FLEX-Topo vs GLEAM        | 2719.000             | 7.251    | Yes              |
| FLEX-Topo vs SSEBop       | 2164.000             | 5.771    | Yes              |
| SSEBop vs GLEAM           | 555.000              | 1.480    | No               |

**(c) Senescence/green-down phenophase – Deseasonalised time series: Kruskal-Wallis One Way Analysis of Variance on Ranks**

| <b>Group</b> | <b>N</b> | <b>Missing</b> | <b>Median</b> | <b>25%</b> | <b>75%</b> |
|--------------|----------|----------------|---------------|------------|------------|
| FLEX-Topo    | 36       | 0              | 67.040        | 64.465     | 68.800     |
| GLEAM        | 36       | 0              | 60.688        | 56.498     | 63.518     |
| MOD16A2      | 36       | 0              | 66.169        | 65.125     | 68.714     |
| SSEBop       | 36       | 0              | 61.539        | 59.068     | 64.144     |
| TerraClimate | 36       | 0              | 66.696        | 63.171     | 73.837     |
| WaPOR        | 36       | 0              | 78.087        | 75.177     | 86.048     |

H = 122.053 with 5 degrees of freedom. (P = <0.001)

The differences in the median values among the treatment groups are greater than would be expected by chance; there is a statistically significant difference (P = <0.001)

To isolate the group or groups that differ from the others use a multiple comparison procedure.

All Pairwise Multiple Comparison Procedures (Tukey Test):

| <b>Comparison</b>         | <b>Diff of Ranks</b> | <b>q</b> | <b>P&lt;0.05</b> |
|---------------------------|----------------------|----------|------------------|
| WaPOR vs GLEAM            | 5106.000             | 13.616   | Yes              |
| WaPOR vs SSEBop           | 4833.000             | 12.888   | Yes              |
| WaPOR vs TerraClimate     | 2655.000             | 7.080    | Yes              |
| WaPOR vs FLEX-Topo        | 2651.000             | 7.070    | Yes              |
| WaPOR vs MOD16A2          | 2641.000             | 7.043    | Yes              |
| MOD16A2 vs GLEAM          | 2465.000             | 6.574    | Yes              |
| MOD16A2 vs SSEBop         | 2192.000             | 5.846    | Yes              |
| MOD16A2 vs TerraClimate   | 14.000               | 0.0373   | No               |
| MOD16A2 vs FLEX-Topo      | 10.000               | 0.0267   | Do Not Test      |
| FLEX-Topo vs GLEAM        | 2455.000             | 6.547    | Yes              |
| FLEX-Topo vs SSEBop       | 2182.000             | 5.819    | Yes              |
| FLEX-Topo vs TerraClimate | 4.000                | 0.0107   | Do Not Test      |
| TerraClimate vs GLEAM     | 2451.000             | 6.536    | Yes              |
| TerraClimate vs SSEBop    | 2178.000             | 5.808    | Yes              |
| SSEBop vs GLEAM           | 273.000              | 0.728    | No               |

**(d) Dormant phenophase – Deseasonalised : Kruskal-Wallis One Way Analysis of Variance on Ranks**

| Group        | N  | Missing | Median | 25%    | 75%    |
|--------------|----|---------|--------|--------|--------|
| FLEX-Topo    | 36 | 0       | 65.616 | 59.997 | 71.778 |
| GLEAM        | 36 | 0       | 59.736 | 51.455 | 67.664 |
| MOD16A2      | 36 | 0       | 67.602 | 62.737 | 71.397 |
| SSEBop       | 36 | 0       | 63.150 | 56.043 | 69.583 |
| TerraClimate | 36 | 0       | 62.659 | 56.768 | 75.396 |
| WaPOR        | 36 | 0       | 81.323 | 75.629 | 86.876 |

H = 66.606 with 5 degrees of freedom. (P = <0.001)

The differences in the median values among the treatment groups are greater than would be expected by chance; there is a statistically significant difference (P = <0.001)

To isolate the group or groups that differ from the others use a multiple comparison procedure.

All Pairwise Multiple Comparison Procedures (Tukey Test):

| Comparison                | Diff of Ranks | q      | P<0.05      |
|---------------------------|---------------|--------|-------------|
| WaPOR vs GLEAM            | 3960.000      | 10.560 | Yes         |
| WaPOR vs SSEBop           | 3403.000      | 9.075  | Yes         |
| WaPOR vs FLEX-Topo        | 2789.000      | 7.438  | Yes         |
| WaPOR vs TerraClimate     | 2780.000      | 7.414  | Yes         |
| WaPOR vs MOD16A2          | 2356.000      | 6.283  | Yes         |
| MOD16A2 vs GLEAM          | 1604.000      | 4.277  | Yes         |
| MOD16A2 vs SSEBop         | 1047.000      | 2.792  | No          |
| MOD16A2 vs FLEX-Topo      | 433.000       | 1.155  | Do Not Test |
| MOD16A2 vs TerraClimate   | 424.000       | 1.131  | Do Not Test |
| TerraClimate vs GLEAM     | 1180.000      | 3.147  | No          |
| TerraClimate vs SSEBop    | 623.000       | 1.661  | Do Not Test |
| TerraClimate vs FLEX-Topo | 9.000         | 0.0240 | Do Not Test |
| FLEX-Topo vs GLEAM        | 1171.000      | 3.123  | Do Not Test |
| FLEX-Topo vs SSEBop       | 614.000       | 1.637  | Do Not Test |
| SSEBop vs GLEAM           | 557.000       | 1.485  | Do Not Test |

Table S7. Kendall correlation coefficients of rainfall and evaporation for the period 2009 to 2020 in the Luangwa Basin, Zambia, southern Africa. The values in **bold** are significant at alpha level 0.05.

| Variable        | Rainfall     | E <sub>wb</sub> | FLEX-Topo    | MOD16A2      | GLEAM        | SSEBop       | TerraClimate | WaPOR |
|-----------------|--------------|-----------------|--------------|--------------|--------------|--------------|--------------|-------|
| Rainfall        | 1.000        | <b>0.485</b>    | 0.303        | 0.303        | 0.333        | 0.212        | 0.273        | 0.121 |
| E <sub>wb</sub> | <b>0.485</b> | 1.000           | <b>0.515</b> | 0.333        | 0.242        | 0.364        | 0.121        | 0.273 |
| FLEX-Topo       | 0.303        | <b>0.515</b>    | 1.000        | <b>0.515</b> | <b>0.485</b> | <b>0.606</b> | 0.364        | 0.394 |
| MOD16A2         | 0.303        | 0.333           | <b>0.515</b> | 1.000        | <b>0.667</b> | <b>0.606</b> | 0.182        | 0.394 |
| GLEAM           | 0.333        | 0.242           | <b>0.485</b> | <b>0.667</b> | 1.000        | <b>0.455</b> | <b>0.455</b> | 0.121 |
| SSEBop          | 0.212        | 0.364           | <b>0.606</b> | <b>0.606</b> | <b>0.455</b> | 1.000        | 0.212        | 0.364 |
| TerraClimate    | 0.273        | 0.121           | 0.364        | 0.182        | <b>0.455</b> | 0.212        | 1.000        | 0.121 |
| WaPOR           | 0.121        | 0.273           | 0.394        | 0.394        | 0.121        | 0.364        | 0.121        | 1.000 |
